# Supplementary material
Source: PubMed Central journal article supplement (PMC2782285)
Supplement: tpc.108.063677_1.pdf [file tpc.108.063677_1.pdf]

Supplemental Data. Swaminathan et al. (2009). CYP76M7 is an *ent*-cassadiene C11-hydroxylase defining a second multifunctional diterpenoid biosynthetic gene cluster in rice.

**Supplemental Figure 1:** Production of C11-keto-*ent*-cassadiene by CYP76M7 in vitro. A) GC-MS chromatograph of assay extract (**1**, *ent*-cassadiene; **3**, C11-keto-*ent*-cassadiene). B) Mass spectra for **3** (C11-keto-*ent*-cassadiene).

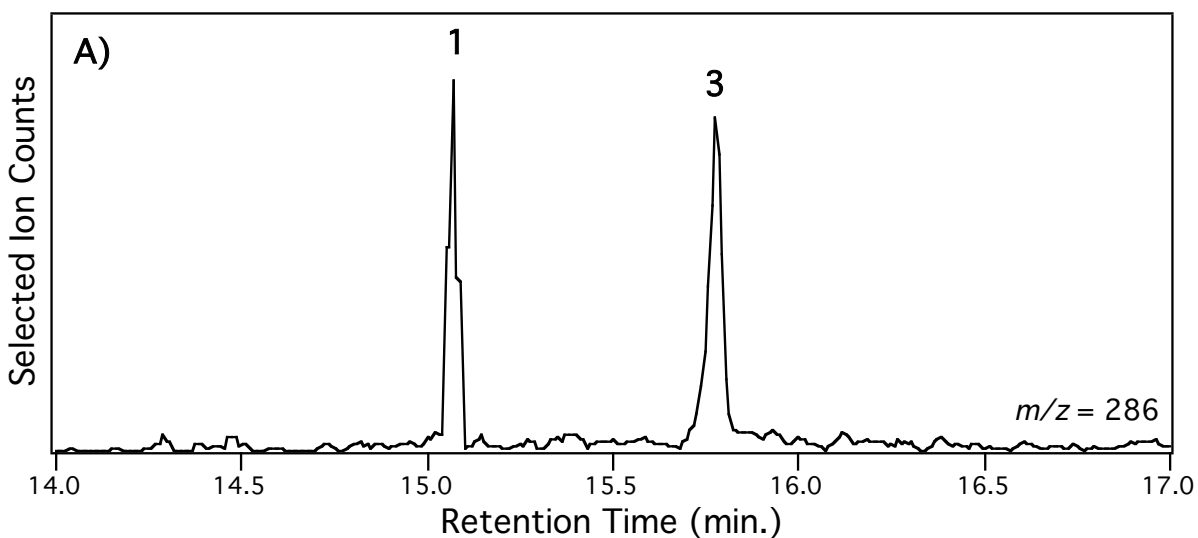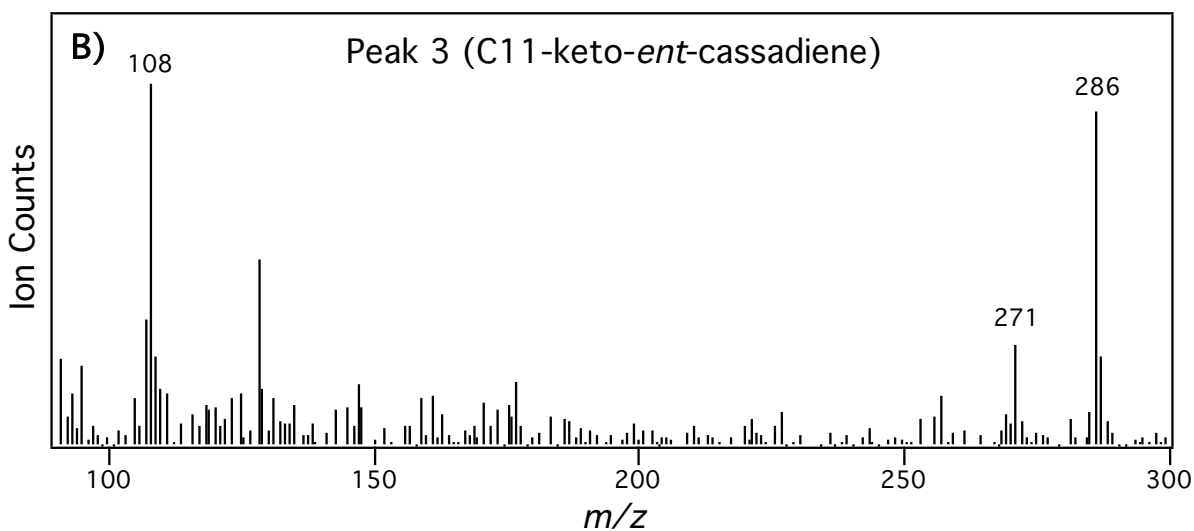

**Supplemental Figure 2: Production of C11-keto-*ent*-cassadiene from C11 $\alpha$ -hydroxyl-*ent*-cassadiene by recombinant bacteria expressing CYP76M7 and Os-CPR1. A) GC-MS chromatograph of fed culture extract (**2**, C11 $\alpha$ -hydroxyl-*ent*-cassadiene; **3**, C11-keto-*ent*-cassadiene). B) Mass spectra for **3** (C11-keto-*ent*-cassadiene).**

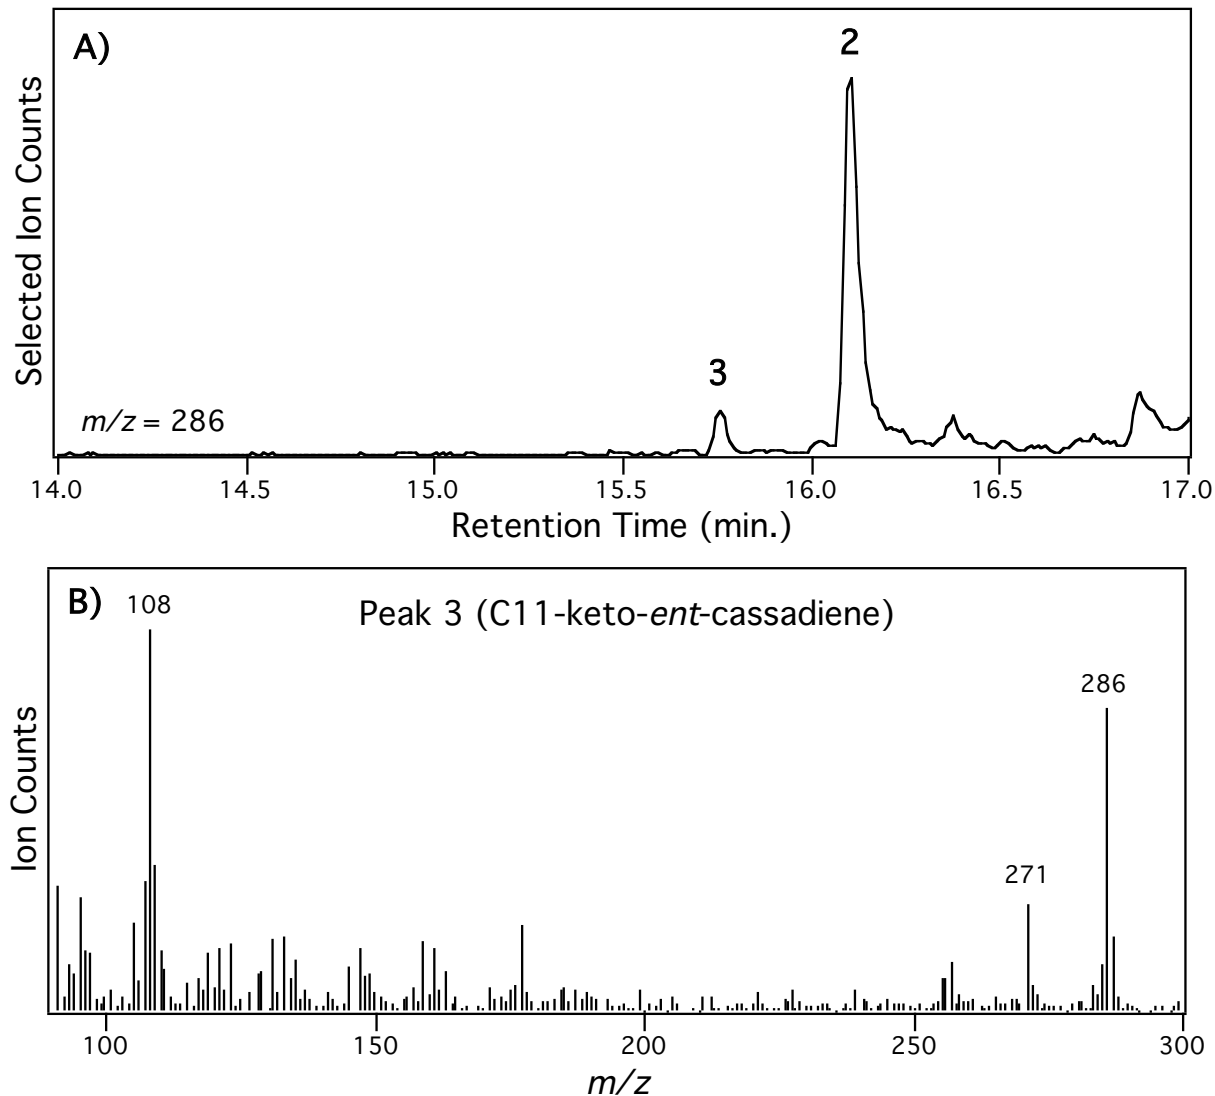

**Supplemental Figure 3: Alignments used to generate the phylogenetic trees in Figure 6. A) Alignment of CPS used for phylogenetic tree in Figure 6A. B) Alignment of KSL used for phylogenetic tree in Figure 6B. C) Alignment of CYP used for phylogenetic tree in Figure 6C.**

Supplemental Figure 1A

|         |             |             |             |             |             |             |             |             |     |
|---------|-------------|-------------|-------------|-------------|-------------|-------------|-------------|-------------|-----|
| Os-CPS1 | ---MIH--LH  | SPP-----    | ---TAPAAF   | GAGSADWRRR  | RRWSWSSSSR  | APVAKGGHLR  | PCVWRRGGDD  | GGGEDHHADS  | 65  |
| Zm-CPS1 | ---MPY--PH  | PYP-----    | ---WQSSR--  | -----RRR    | RRRGRDGP    | QPQA-----   | RVVER-----  | -----AAA    | 39  |
| At-CPS  | -MSLQYHVLN  | SIPSTTFLSS  | TKTTISSSFL  | TISGSPLNVA  | RDKSRSGSIH  | C-----      | -----       | -----       | 50  |
| Os-CPS2 | MQMQVLTAAS  | SLPRATLL-R  | PAAA--E--   | -----PWRQS  | --FLQLQAR   | PIQRPGIML-  | -----       | -----       | 45  |
| Os-CPS4 | --MPVFTA--  | SFQCVTLFGQ  | PASAADAQ--  | -----PLLQG  | QRPFLLHAR   | RRRPCGML-   | -----       | -----       | 48  |
| Os-CPS1 | GGGGGGAAW   | RARATTAGVS  | SSSSTAKGLQ  | ANIEHETPR   | ITKWPNESRD  | LDDHQQNNEA  | DEEADDELQP  | LVEQVRSMLS  | 145 |
| Zm-CPS1 | GPG-----    | --HATTQQP   | DNVSSAKVFQ  | TSRVETESK-  | -LRNGRKPQD  | LEDEHQAEAA  | -----ELQP   | LIDQVRAMLR  | 102 |
| At-CPS  | -----       | -----       | SKLRTQEYIN  | SQEVQHDPL   | IHEW----QQ  | LQGEDAPQIS  | VGSNSNAFKE  | AVKSVKTI LR | 106 |
| Os-CPS2 | -----       | --HCKAQLQ-  | -GQETRERRQ  | LDDDEHARP-  | -----PQG    | GDDDDVAASTS | -----ELPY   | MIESIKSKLR  | 97  |
| Os-CPS4 | -----       | --ISKSPYP   | ASEETREWEA  | EGQHEHT--   | -----       | --DELRETTT  | -----T--    | MIDGIRTALR  | 92  |
| Os-CPS1 | SMED--GAI   | TASAYDTAWVA | LVPRLDGGEG  | TQ--FPAAYR  | WIVGSQLADG  | SWGDEALFSA  | YDRVINTLAC  | VVALTRWSLH  | 221 |
| Zm-CPS1 | SMND--GDS   | TASAYDTAWVA | MVPKVGDDGG  | AQPQFPATVR  | WIVDHLQPDG  | SWGDSALFSA  | YDRMINTLAC  | VVALTKWSLE  | 180 |
| At-CPS  | NLTD--GEIT  | TASAYDTAWVA | LID A--GD   | KTPAFPASAVK | WIAENQLSDG  | SWGDAYLFSY  | HDRLINTLAC  | VVALTRWSNLF | 180 |
| Os-CPS2 | AARNLSGETT  | VSAYDTAWIA  | LVNRLDGGGE  | RSPQFPEAID  | WIARNQLPDG  | SWGDAGMFIV  | QDRLINTLGC  | VVALATWGVH  | 177 |
| Os-CPS4 | SIGE--GEIS  | TASAYDTSLVA | LLKRLDGGD-  | -GQFPSTID   | WIVQNQLPDG  | SWGDAFFMM   | GDRIMSTLAC  | VVALKSWNIH  | 168 |
| Os-CPS1 | HDQCKQGLQF  | LNLNLWRLAE  | EEDPTMPIGF  | EIAFPSSLVEA | ARGLGI-DFP  | YDHPALKGIY  | ANRELKLRKI  | PKDMMHIVPT  | 300 |
| Zm-CPS1 | PARCEAGLSF  | LHENMWRLAE  | EEAESMPIGF  | EIAFPSLIQT  | ARDLGVVDFP  | YGHAPLQSIY  | ANREVKLRKI  | PRDMMHRVPT  | 260 |
| At-CPS  | PHQCNGITF   | FRENIGKLED  | ENDEHMPIGF  | EVAFPSLLEI  | ARGINI-DVP  | YDSPVLKDIY  | AKKELKLTRI  | PKEIMHKIPT  | 259 |
| Os-CPS2 | EEQRARGLAY  | IQDNLWRLGE  | DDEEWMVGF   | EITFPVLEK   | AKNLGL-DIN  | YDDPALQDIY  | AKRQLKLAKI  | PREALHARPT  | 256 |
| Os-CPS4 | TDKCEGRLLF  | IQENMWRLAH  | EEEDWMLVGF  | EIALPSLLDM  | AKDLDL-DIP  | YDEPALKAIY  | AERERKLAKI  | PRDVLHAMPT  | 247 |
| Os-CPS1 | SILHSLEGMP  | GLDWQRLLKL  | QSCDGSFLFS  | PSATAYALMQ  | TGDKKCFAYI  | DRIKKFDGG   | VPNVYPVDLF  | EHIWVVDRL   | 380 |
| Zm-CPS1 | SILHSLEGMP  | DLDWPRLLNL  | QSCDGSFLFS  | PSATAYALMQ  | TGDKKCFEYI  | DRIVKKFNGG  | VPNVYPVDLF  | EHIWVVDRL   | 340 |
| At-CPS  | TLLHSLEGMR  | DLDWEKLLKL  | QSODGSFLFS  | PSATAFAMQ   | TRDNCLEYL   | RNAVKRFNGG  | VPNVFPVDLF  | EHIWVDRLR   | 339 |
| Os-CPS2 | TLLHSLEGME  | NLDWERLLQF  | KCPAGSLHSS  | PAASAYALSE  | TGDKELLEYL  | ETAINNFDGG  | APCTYPVDNF  | DRLWSVDRLR  | 336 |
| Os-CPS4 | TLLHSLEGMV  | DLDWEKLLKL  | RCLDGSFHCS  | PASTATAFQQ  | TGDKKCFEYL  | DGIVKKFNGG  | VPCIYPLDVY  | ERLWAVDRLT  | 327 |
| Os-CPS1 | RLGISRYFQR  | EIEQNMDYVN  | RHWTEGICW   | ARNSNVKEVD  | DTAMAFRLLR  | LHGYNVSPSV  | FKNFEKDGEF  | FCFVGQST-Q  | 459 |
| Zm-CPS1 | RLGISRYFQR  | EIEQCMDYVN  | RHWTEGICW   | ARKSNVKDVD  | DTAMAFRLLR  | LHGYNVSPSV  | FKNFEKDGEF  | FCFVGQST-Q  | 419 |
| At-CPS  | RLGISRYFEE  | EIKECLDYVH  | RYWTDNGICW  | ARCSHVQDID  | DTAMAFRLLR  | QHGYQVSADV  | FKNFEKEGEF  | FCFVGQSN-Q  | 418 |
| Os-CPS2 | RLGISRYFTS  | EIEEYLEYAY  | RHLSPDGMYS  | GGLCVPVKDID | DTAMAFRLLR  | LHGYNVSSSV  | FNHFEKDGGEY | FCFAGQSS-Q  | 415 |
| Os-CPS4 | RLGISRHFTS  | EIEDCLDYIF  | RNWTPDGLAH  | TKNCPVKDID  | DTAMGFRLLR  | LYGYQVDPVC  | LKKFEKDGKF  | FCLHGESNPS  | 407 |
| Os-CPS1 | AVTGMYNLNR  | ASQISFPGED  | -ILQRARNFS  | YEFLREREAQ  | GTLHDKWII S | KDLPGEVQYT  | LDFPWAYASLP | RVEARTYIGQ  | 538 |
| Zm-CPS1 | AVTGMYNLNR  | ASQISFGQED  | -VLHRRARVFS | YEFLRQREEQ  | GMI RDKWIVA | KDLPGEVQYT  | LDFPWAYASLP | RVEARTYLDQ  | 498 |
| At-CPS  | AVTGMFNLYR  | ASQLAFPREE  | -ILKNAKEFS  | YNYLLEKRER  | EELIDKWIIM  | KDLPGEIGFA  | LEIPWAYASLP | RVETRYIDQ   | 497 |
| Os-CPS2 | SLTAMYSYR   | ASQIVFPQDD  | DGLEQLRAYC  | RAFLEERRAT  | GNLMDKWIVA  | NGLPSEVEYA  | LDFPWKASLP  | RVETRYVLEQ  | 495 |
| Os-CPS4 | SVTPMYNTYR  | ASQLKFPQDD  | GVLGRAEVFC  | RSFLQDRRGS  | NRMKDKWIVA  | KDIPGEVEYA  | MDYPWKASLP  | RIETRLYLDQ  | 487 |
| Os-CPS1 | YGGNDDVWIG  | KTLYRMPIVN  | NATYLELAKQ  | DFNRCQALHQ  | HELOGLQKWF  | IENGLEAFGM  | TPE--DVLRA  | YFLAAACIFE  | 616 |
| Zm-CPS1 | YGGKDDVWIG  | KTLYRMPLVN  | NDTYLELAIR  | DFNHCQALHQ  | LECNGLQTWY  | KDNCLDAFGV  | EPQ--DVLRS  | YFLAAACIFE  | 576 |
| At-CPS  | YGGENDVWIG  | KTLYRMPYVN  | NNGYLELAKQ  | DYNNCQAQHQ  | LEWDIFQKWY  | EENRLSEWGV  | RRS--ELLEC  | YFLAAACIFE  | 575 |
| Os-CPS2 | YGASEDAWIG  | KGLYRMTLVN  | NDLYLEAAKA  | DFTNFQRLSR  | LEWLSLKRWY  | IRNNLQAHGV  | TEQ--SVLRA  | YFLAAANIFE  | 573 |
| Os-CPS4 | YGGSGDVWIG  | KVLHRMTLFC  | NDLYLKAACA  | DFSNFQKECR  | VELNGLRRWY  | LRSNLERFGG  | TDPQTLMTS   | YFLASANIFE  | 567 |
| Os-CPS1 | PNRASERLAW  | ARVSVLANTI  | SRHFYSDMSS  | MK---RMER   | FMWSSLYEE-  | --NGNVLGL   | GYAKDGILAR  | TLCQLIDLLS  | 689 |
| Zm-CPS1 | PSRAAERLAW  | ARTSMIANAI  | STHLRDI SED | KK---RLEC   | FV-HCLYEE-  | --N-DVSWLK  | RNPNDVILER  | ALRRLINLLA  | 647 |
| At-CPS  | SERSHERMVV  | AKSSVLVKA I | SSSFGESSDS  | RRSFSDQFHE  | YIANARRSDH  | HFNDRNMRLD  | R-PGSVQASR  | LAGVLIGTLN  | 654 |
| Os-CPS2 | PNRAAERLAW  | ARTAILAEAI  | ASHLRQYSAN  | GAA-DGMTER  | LISGLASHDW  | DWRESKDSAA  | RS-----LLY  | ALDELIDLHA  | 647 |
| Os-CPS4 | PNRAAERLAW  | ARVALLADAV  | SSHFR-----  | -----       | -IGG-----   | -----       | KN-----LTS  | NLEELISLVP  | 612 |
| Os-CPS1 | QETPPVREGQ  | -KCIHNLIRC  | AWIEWMMQ-Q  | INMKDGRYDK  | GRVMHPGSCT  | VHNKETCLLI  | AQIVEICAGR  | IEEAASMINN  | 767 |
| Zm-CPS1 | QEALPIHEGQ  | -RFIHSLLSL  | AWTEWMLQ-K  | ANKEENKYHK  | CSGIEP-QYM  | VHDRQTYLLL  | VQVIEICAGR  | IGEAVSMINN  | 724 |
| At-CPS  | QMSFDLFMSH  | GRDVNNLLYL  | SWGDMWEKWK  | LYGDEGEGE-  | -----LM     | -----LM     | VKMIILMKNN  | -----DLTNF  | 710 |
| Os-CPS2 | -----F      | GNA-SDSLRE  | AWKQWLSWT   | --NESQGSTG  | G-----      | -----DTALL  | VRTIEICSGR  | HGSAEQSLKN  | 702 |
| Os-CPS4 | -----F      | DDAYSGLRE   | AWKQWLMAWT  | AKESSQESIE  | G-----      | -----DTAILL | VRAIEIFGGR  | HVLTGQR-PD  | 669 |
| Os-CPS1 | TEGSWF IQLA | ---SSICDSL  | HAKMLLSQDT  | KKNETTINOI  | DKEIELGMQE  | LAQYLLPRVD  | DRRINNKTKQ  | TFLSIVKSCY  | 844 |
| Zm-CPS1 | KDNDWF IQLT | ---CATCDSL  | NHRMLLSQDT  | MKNEARINWI  | EKEIELNMQE  | LAQSLLLRCD  | EKTSNKKTKK  | TLWDVLRSLY  | 801 |
| At-CPS  | FTHTHFVRLA  | EIINRIC--L  | PROYLKARRN  | DEKERTIKSM  | EKEMJ-KMVE  | LA-----LS   | ESDTFRDVS I | TFLDVAKAFY  | 781 |
| Os-CPS2 | SAD--YARLE  | QIASSMCSKL  | ATKIL-AQ-N  | GGSDMNVEGI  | DQEVDVEMKE  | LIQRVYGSSS  | -NDVSSVTRQ  | TFLDVKVSKF  | 777 |
| Os-CPS4 | LWE--YSQLE  | QLTSSICRKL  | YRRVL-AQEN  | GKSTEKVEEI  | DQQLDLEMQE  | LTRRVLQGCS  | -A-INRLTRE  | TFLHVVKSKF  | 744 |
| Os-CPS1 | YAANCSPHML  | DQHISEVIFE  | QVI         | 867         |             |             |             |             |     |
| Zm-CPS1 | YATHSPQHMI  | DRHVSRIIFE  | PV-         | 823         |             |             |             |             |     |
| At-CPS  | YFALCGDH-L  | QTHISKVLFQ  | KV-         | 802         |             |             |             |             |     |
| Os-CPS2 | YVAHCSPETI  | DGHISKVLFE  | DVN         | 800         |             |             |             |             |     |
| Os-CPS4 | YVAYCSPETI  | DNHIDKVI FQ | DVI         | 767         |             |             |             |             |     |

Supplemental Figure 1B

|          |                     |                     |                         |                     |                     |                     |                     |                     |     |
|----------|---------------------|---------------------|-------------------------|---------------------|---------------------|---------------------|---------------------|---------------------|-----|
| Os-KSL5  | M I L P M S S A C L | -----G-             | Q F L R A S P R - -     | ----GMI-EQ          | F N R A P P L R V S | I-----              | -----               | RG-AAGVEKS          | 44  |
| Os-KSL6  | M M L P M S S A C S | -----GG             | Q F P G A S P H - -     | ----GIIPKQ          | F S R A P R I R V S | I-----              | -----               | RG-AAGVEKS          | 46  |
| Os-KSL8  | M M L - L S S S Y S | -----GG             | Q F P G V S P L - -     | ----GTRPKR          | S T T V V P R P V V | T-----              | -----               | RA - GGVRNN         | 44  |
| Os-KSL11 | M M L - L S S S Y S | -----GG             | Q F P G V S P L - -     | ----GTRPKR          | S T T V V P L P V V | T-----              | -----               | R A T A G G V R N N | 46  |
| Os-KSL10 | - M L P - S S I C S | -----MG             | Q I P R T S P H - -     | --YGMPLPKQ          | M S K G H P - P M V | T-----              | -----               | R A V - G G V E K G | 45  |
| Os-KS1   | M M M L L L P S S S | SSCCCCRC            | P G G F H G A P P R - - | --VMAPRR--          | -----GV             | T--RVYIEK           | -RL-                | -GVGG-              | 49  |
| Os-KSL7  | M M L L G S P S S G | GY-----GG           | K F A G A S P A G G     | T T T M A P S A K Q | P S S R A P P P G I | T--GGRNDL           | -RILSPA             | A A V G G L E M K K | 70  |
| Os-KSL4  | M A S P M E A V A R | S S L V L A P R R R | R A L G L L P A A A     | A P F V L D C R R R | H N G G M R R P H V | S F A C S A E L D T | G R R Q L P S T G T | R A V M S S C P G Y | 80  |
| At-KS    | M S I N L R S S G C | S-----              | -----S P I S A          | T L E R G L D S E V | Q T R A - - - - -   | -----               | -----               | -----               | 30  |
| Os-KSL5  | L G L G R N A G S Q | Q G M Q K N Q L Q D | K I R K Q L R E V Q     | L S P S S Y D T A W | V A M V P V Q G S H | Q - T P R F P Q C   | I E W I M Q N Q H D | D G S W G T N L - P | 121 |
| Os-KSL6  | L G L G R N A G S Q | Q G M H K N E L H D | K I R K Q L R D V Q     | L Q P S S Y D T A W | V A M V P V Q G S H | Q - T P R F P Q S   | I E W I L Q N Q Y D | D G S W G T N L - P | 123 |
| Os-KSL8  | L E V V G N A G T L | Q G M D I D E L R V | I V R K Q L Q G V E     | L S P S S Y D T A W | V A M V P V Q G S R | Q - S P C F P Q C   | V E W I L Q N Q Q E | D G S W G H S A G P | 122 |
| Os-KSL11 | L E V V G N A G T L | Q G M D I D E L R V | I V R K Q L Q G V E     | L S P S S Y D T A W | V A M V P V Q G S P | Q - S P C F P Q C   | V E W I L Q N Q Q E | D G S W G H S A G P | 124 |
| Os-KSL10 | - E V G N V R S L   | Q V M H S K E L Q A | K I R R Q L Q R V E     | L S P S L Y D T A W | V A M V P E R S S S | Q - A P C Y P Q C   | I E W I L Q N Q H D | D G S W G I N S S - | 121 |
| Os-KS1   | ---GNASSL           | Q D M H R K E L Q A | R T F R D Q L T L E     | L S T S L Y D T A W | V A M V P L R G S R | Q - H P C F P Q C   | V E W I L Q N Q Q D | D G S W G T R - G F | 122 |
| Os-KSL7  | P E A E G I A E S L | Q A T H R K E L E A | S I R K Q L Q G V E     | L S P S Y D T A W   | V A M V P L R G S S | H - N P S F P Q C   | V D W I L E N Q W D | D G S W S I D - G S | 147 |
| Os-KSL4  | V E G R M V G E N T | S Q I N M Q R - E A | R I R R H L E N P E     | F L P S S Y D I A W | V A M V P L P G T D | H L Q A P C F P E C | V E W I L Q N Q H S | N G S W G V N - E F | 158 |
| At-KS    | -----               | N N V S F E Q T K   | K I R K M L E K V E     | L S V S A Y D T S W | V A M V P S P S S Q | N - A P L F P Q C   | V K W L L D N Q H E | D G S W G L D N H D | 98  |
| Os-KSL5  | G S V V N K D I L L | C T L A C V V A L K | R W N T G R D H I S     | R G L N F I G K N F | W V A M D E Q T I A | P V G F N I T F S G | L L N L A T G T G L | E F P V M Q T D I D | 201 |
| Os-KSL6  | G S V V N K D I L L | C T L A C V V A L K | R W N T G R D H I S     | R G L N F I G R N F | S V A M D E Q T I A | P V G F N I T F S G | L L S L A T R T G L | E F P V M Q T D I D | 203 |
| Os-KSL8  | S G E V N K D I L L | S T L A C V L A S S | I W N V G Q D H I R     | R G L S F I G R N F | S V A I D G Q C A A | P V G F N I T F S G | M L R L A I G M G L | K F P V M E T D I D | 202 |
| Os-KSL11 | S G E V N K D I L L | S T L A C V L A S S | T W N V G Q D H I R     | R G L S F I G R N F | S V A I D G Q C A A | P V G F N I T F S G | M L H L A I G M G L | K F P V M E T D I D | 204 |
| Os-KSL10 | S L S V N K D I L L | S T L A C V L A L K | K W N A G S Y H I K     | R G L N F V G R N F | S M A D V Q N I A   | P V G F N V T F S G | L I T L A S G M G L | Q P V M Q T D I D   | 201 |
| Os-KS1   | G V A V T R D V L S | S T L A C V L A L K | R W N V G Q E H I R     | R G L D F I G R N F | S I A M D E Q I A A | P V G F N I T F P G | M L S L A M G M D L | E F P V R Q T D V D | 202 |
| Os-KSL7  | I S T A N K D V L S | S T L A C V L A L K | K W N V G R E H I R     | R G L S F I G R N F | S I A M D D Q A V A | P I G F G I T F P A | M L T L A N G S G L | E F P V R Q N D I D | 227 |
| Os-KSL4  | D S S A S K D I L L | S T L A C I A L E   | K W N V G S E Q I R     | R G L H F I A K N F | S I V I D D Q I A A | P I G F N L T F P A | M V N L A I K M G L | E F P A S E I S I D | 238 |
| At-KS    | H Q S L K K D V L S | S T L A S I L A L K | K W G I G E R Q I N     | K G L Q F I E L N S | A L V T D E T I Q K | P T G F D I I F P G | M I K Y A R D L N L | T I P L G S E V V D | 178 |
| Os-KSL5  | G I F H M R K I E L | E R D A Y G T A S S | R R A F M A Y V S E     | G L D - S L Q D W D | Q V M A Y Q R K N R | S I F N S P S A T A | A T V I H G H N D S | A L C Y L D S L V S | 280 |
| Os-KSL6  | G I I H I R K I E L | E R D A Y G T A S S | R R A F M A Y V S E     | G L G - N L Q D W N | Q V M A Y Q R K N G | S I F N S P S A T A | A T I I H G H N Y S | G L A Y L D F V T S | 282 |
| Os-KSL8  | S I F R L R E V E F | E R D A G G T A S A | R K A F M A Y V S E     | G L G - R E Q D W D | H V M A Y Q R K N G | S L F N S P S T T A | A S A I H S C N D R | A L D Y L V S L T S | 281 |
| Os-KSL11 | S I F R L R E V E F | E R D A G G T A S A | R K A F M A Y V S E     | G L G - R E Q D W D | H V M A Y Q R K N G | S L F N S P S T T A | A S A I H S C N D R | A L D Y L V S L T S | 283 |
| Os-KSL10 | E I F H L R K I E L | E R D S G G T I S A | R K A F M A Y V A E     | G F G - S L Q D W D | Q V M A Y Q R K N G | S L F N S P S T T A | A A A I H T F N D R | T L N Y L D S L T N | 280 |
| Os-KS1   | R L L H L R E I E L | E R E A G D H S Y G | R K A Y M A Y V T E     | G L G - N L L E W D | E I M M F Q R K N G | S F F N C P S T T A | A T L V N H Y N D K | A L Q Y L N C L V S | 281 |
| Os-KSL7  | S L N H L R E M K I | Q R E A G N H S R G | R K A Y M A Y L A E     | G F G - N L L E W D | E I M M F Q R K N G | S L F N C P S S T A | G A L A N Y H D D K | A L Q Y L Q S L V N | 306 |
| Os-KSL4  | Q I L H L R D M E L | K R L S G E E S L G | K E A Y F A Y I A E     | G L E E S M V D W S | E V M K F Q G K N G | S L F N S P A A T A | A A L V H R Y D D K | A L G Y L Y S V V N | 318 |
| At-KS    | D M I R K R D L D L | K C D S E K F S K G | R E A Y L A Y V L E     | G T - R N L K D W D | L I V K Y Q R K N G | S L F D S P A T T A | A A F T Q F G N D G | C L R Y L C S L L Q | 257 |
| Os-KSL5  | K L H G P V P V M Y | P Q N A Y S Q L C M | V D T L E K M G I S     | N N F S C E I S D I | L D M I Y R L W I H | N E E E L M L E M G | T C A M A F R L L R | M H G Y D I S S D G | 360 |
| Os-KSL6  | K F G G P V P V M Y | P Q N A Y S Q L C M | V D T L E R M G I S     | E S F A C E I S D I | L D M T Y R L W M H | N E E E L M L D M R | T C A M A F R L L R | M H G Y D I T S D G | 362 |
| Os-KSL8  | K L G G P V P A I Y | P D K V Y S Q L C M | V D T L E K M G I S     | S D F A C I R D I D | L D M T Y S C W M Q | D E E E I M L D M A | T C A K A F R L L R | M H G Y D V S S E G | 361 |
| Os-KSL11 | K L G G P V P A I H | P D K V Y S Q L C M | V D T L E K M G I S     | S D F A C I R D I D | L D M T Y S C W M Q | D E E E I M L D M A | T C A K A F R L L R | M H G Y D V S S E G | 363 |
| Os-KSL10 | K F G G P V P A M Y | P Q N I Y S Q L C T | V D A L E R T G I S     | Q K F A R E I R D I | L D T T Y R S W L H | N E E E V M L D I P | T C A M A F R L L R | T H G Y D I T S D E | 360 |
| Os-KS1   | K F G S A V P T V Y | P L N I Y C Q L S W | V D A L E K M G I S     | K Y F V S E I K S I | L D T T Y S W L E   | R D E E I M L D I T | T C A M A F R L L R | M N G Y H V S S V E | 361 |
| Os-KSL7  | K F D G V V P T L Y | P L N I Y C Q L S M | V D A L E N M G I S     | Q Y F A S E I K S I | L D M T Y S S W L G | K D E E I M L D V T | T C A M A F R L L R | M N G Y D V S S D E | 386 |
| Os-KSL4  | K F G G E V P T V Y | P L N I F S Q L S M | V D T L V N I G I S     | R H F S S D I K R I | L D K T Y I L W S Q | R D E E V M L D L P | T C A M A F R L L R | M N G Y G V S S D D | 398 |
| At-KS    | K F E A A V P S V Y | P F D Q Y A R L S I | I V T L E S L G I D     | R D F K T E I K S I | L D E T Y R Y W L R | G D E E I C L D L A | T C A L A F R L L L | A H G Y D V S Y D P | 337 |
| Os-KSL5  | M A Q F V E Q S S F | D D S I H G Y L N D | T K A L L E L Y R S     | S Q I R C L E D D L | I L Q D I G S W S A | - R V L Q E K I S S | ---KMTHKS-          | E M L G V E Y A L K | 435 |
| Os-KSL6  | M A Q F V E Q S S F | D D S I H G Y L N D | T K A L L E L Y R S     | S Q L R C L E D D L | I L E E I G S W S A | - R V L L E K I S S | ---KMIHIS-          | E L P E V E Y A L K | 437 |
| Os-KSL8  | M A R F A E R S S F | D D S I H A Y L N D | T K P L L E L Y K S     | S Q V H F L E E D F | I L E N I G S W S A | - K L L K Q Q L S F | ---NKISKS-          | L M P E V E Y A L K | 436 |
| Os-KSL11 | M A R F A E R S S F | D D S I H A Y L N D | T K P L L E L Y K S     | S Q L H F L E E D L | I L E N I S S W S A | - K L L K Q Q L S S | ---NKIMKS-          | L M P E V E Y A L K | 438 |
| Os-KSL10 | M A H F S E Q S S F | D D S I H G Y L N D | T K T L L E L F K T     | S Q I R F S C E D L | V L E N I G T W S A | - K L L K Q Q L L S | ---NKLSTS-          | A Q S E V E Y V L K | 435 |
| Os-KS1   | L S P V A E A S S F | R E S L Q G Y L N D | K K S L I E L Y K A     | S K V S K S E N E S | I L D S I G S W S G | - S L L K E S V C S | ---NGVKKAP-         | I F E E M K Y A L K | 437 |
| Os-KSL7  | L S H V A G A S T F | R D S L Q G Y L N D | R K S V L E V Y K T     | S K H S I S E N D L | I L D S I G S W S G | G S L L K E M L S S | ---NG-KGTP-         | G R E E I E F A L K | 462 |
| Os-KSL4  | L S H V A E A S T F | H N S V E G Y L D D | T K S L L E L Y K A     | S K H S L S E N E P | I L E K M G C W S G | - S L L K E K L C S | ---DDIRGTP-         | I L G E V E Y A L K | 474 |
| At-KS    | L K P F A E E S G F | S D T L E G Y V K N | T F S V L E L F K A     | A Q S Y - - P H E S | A L K K Q C C W T - | K Q Y L E M L S S   | W V K T S V R D K Y | L K K E V E D A L A | 414 |
| Os-KSL5  | F P V Y A T L E R L | E Q K R N I E Q F K | T K E Q L K I E G F     | K L L K S G Y - R G | A I T H D E I L A L | A V D E F H S S Q S | V Y Q Q E L Q D L N | S W V A H T R L D E | 514 |
| Os-KSL6  | C P V Y A I L E R L | E Q K R N I E Q F K | T K E Q L K I E G F     | K L L K S G Y - R G | V I P N D E I L A L | A V D E F H S S Q S | V Y Q Q E L Q D L N | S W V A H T R L D E | 516 |
| Os-KSL8  | Y P F Y A T V E V L | E H K G N I E R F N | -----VNGF               | Q R L K S G Y - C G | S G A D K E I L A L | A V N K F H Y A Q S | V Y Q Q E L R Y L E | S W V A E F R L D E | 509 |
| Os-KSL11 | Y P L Y S T V D A L | S H R G N I E R F N | -----VNGF               | Q R P K S G Y - C G | S G A D K E I L A L | A V D K F H Y N Q S | V Y Q Q E L R Y L E | S W V A E F G L D E | 511 |
| Os-KSL10 | F P L H S T L D R L | E H R R N I E Q F K | -----VEGS               | K V L K S G Y - C G | S H S N E E I L A L | A V D Y F H S S Q S | V Y Q Q E L K Y F E | S W V K Q C R L D E | 508 |
| Os-KS1   | F P F Y T T L D R L | D H R K N I E R F D | -----AKDS               | Q M L K T E Y - L L | P H A N Q D I L A L | A V E D F S S S Q S | I Y Q D E L N Y L E | C W V K D E K L D Q | 510 |
| Os-KSL7  | Y P F Y S T L E R L | V H R K N I V L F D | -----AKGS               | Q M L K T A C - M P | V H D S Q D F L A L | A V D D F C I S Q S | N Y Q N E L N Y L E | S W V K D N R L D Q | 535 |
| Os-KSL4  | F P F Y A T L E P L | D H K W N I E N F D | -----ARAY               | Q K I K T K N - M P | C H V N E D L L A L | A A E D F S F C Q S | T Y Q N E I Q H L E | S W E K E N K L D Q | 547 |
| At-KS    | F P S Y A S L E R S | D H R R K I L N G S | A-----VENT              | R V T K T S Y R L H | N I C T S D I L K L | A V D D F N F C Q S | I H R E E M E R L D | R W I V E N R L Q E | 489 |
| Os-KSL5  | L K F A R L M P S I | T Y F S A A A T M F | P S E L S E A R I A     | W T Q N C I L T T T | V D D F F D - G D G | S K E E M E N L V K | L I K K W D G H G E | I G F S S E C V E I | 593 |
| Os-KSL6  | L K F A R L M P S I | T Y F S A A A V L L | P S E - - S A R I A     | W T Q N C I L T T T | V D D F F D - G E G | S K E E M E N L V K | L I E K W D D H G E | I G F S S E C V E I | 593 |
| Os-KSL8  | L K F A R V I P L Q | S L L S A V P L F L | P C E L S D A R I A     | W S Q N A I L T A V | V D D L F D - G G G | S M E E M L N L V A | L F D K W D D H G E | I G F C S S N V E I | 588 |
| Os-KSL11 | L K F A R V I P L Q | S L L S A L V P L F | P A E L S D A R I A     | F S Q N C M L T T M | V D D F F D - G G G | S M E E M V N F V A | L I D E W D N H G E | I G F C S N N V E I | 590 |
| Os-KSL10 | L K F A R V M P L I | V H F S S A A T I F | A P E L A D A R M V     | L S Q T C M L I T Y | V D D F F D C P E I | S R E E K E N Y I A | L I E K W D N H A E | I G F C S K N V E I | 588 |
| Os-KS1   | L F F A R Q K L T Y | C Y L S A A A T I F | P R E L S E A R I A     | W A K N G V L T T V | V D D F F D L G - G | S K E E L E N L I A | L V E K W D G H - Q | E E F Y S Q V R I A | 588 |
| Os-KSL7  | L H F A R Q K I T Y | C Y L S G A A T T F | R P E M G Y A R T S     | W A R T A W L T A V | I D D L F D V G - G | L E Q E Q E N L L A | L M E K W E E P G K | D E Y Y S E D V K I | 614 |
| Os-KSL4  | L E F T R K N L I N | S Y L S A A A T I S | P Y E L S D A R I A     | C A K S I A L T L V | A D D F F D V G - S | S K E E Q E N L I S | L V E K W D Q Y H K | V E F Y S E N V K A | 626 |
| At-KS    | L K F A R Q K L A Y | C Y F S G A A T L F | S P E L S D A R I S     | W A K G G V L T T V | V D D F F D V G - G | S K E E L E N L I H | L V E K W D L N G V | P E Y S E H V E I   | 568 |





Supplemental Figure 1C

|          |             |             |            |             |              |            |             |                 |     |
|----------|-------------|-------------|------------|-------------|--------------|------------|-------------|-----------------|-----|
| CYP71Z3  | ALCTALSQTS  | WLTVADLFPS  | -SRLARMLGT | APRRALASRK  | KMELILEQII   | QEREEMTTDR | S-----G-DG  | EAGPT-NECF      | 283 |
| CYP71Z4  | ALRTALDQTT  | WLTVADVFPSS | -SKLARMLGT | APRKALASRK  | KIEHILEQII   | QERKRIM-DR | SSHGGDG-DG  | EAMNT-SECF      | 284 |
| CYP71Z8  | ALRTALDQTT  | WLTVADVFPSS | -SKLARMLGT | APRKALASRK  | KMERILEQII   | QERKQIK-ER | STGAGAGADD  | EAAAAGNECF      | 285 |
| CYP71Z6  | ALEVAKKQIT  | WLSVADLFPS  | -SKLARMVAV | APRKGLASRK  | RMELVIRRII   | QERKDQLMDD | SAAGA-----G | EAA-AGKDCF      | 281 |
| CYP71Z7  | ALEVAKKQIT  | WLSVADLFPS  | -SKLARMVAV | APRKGLASRK  | RMELVIRRII   | QERKDQLMDD | SAAGA-----G | EAA-AGKDCF      | 280 |
| CYP71Z5  | ALHEAKNQLT  | WLTVADLFPS  | -SRLARMLGA | APRRGLASRK  | RIERIADIV    | REHEGYM--- | GSGDGGDEA   | AAAAAGKDCF      | 278 |
| CYP71Z1  | ALHAVVRLTS  | GLSVADLFPS  | -SRLAAMVSA | APRAAIANRD  | KMVRIEQII    | RERKAQIEAD | -----D      | RAA-DSKSCA      | 267 |
| CYP71Z2  | ALHAIHQTS   | ALSVDLFPS   | -SKLASMVAT | GPRNVLANRN  | KVERIEEII    | QERKNQIETD | MMSGNDVDG   | KAIVESKSC       | 282 |
| CYP71W1  | ELDKAVRLTG  | GINLADLYPS  | -SRLVRRLSA | ATRDMAQCQR  | NIYRIAESII   | RDR-----   | -----D      | GAPPERDEE       | 274 |
| CYP99A2  | ALDVGLKFSG  | GFCFGDLFPS  | -LRFIDAMTG | LRSRLWRARG  | QLDSVFDKII   | AQCEEHQGD- | -----       | -----           | 269 |
| CYP99A3  | ALDEALKFVN  | GFCFGDLFPS  | -LRFIDAMTG | LRSRLERLRL  | QLDVFVKIV    | AQCESNPGD- | -----       | -----           | 264 |
| CYP71B13 | VIHGTMEVLG  | SFAASDYFPV  | IGGIIDRITG | LHNKCEKVF   | GTSDFDHCII   | KHHLE----- | -----       | -----DGGSKD     | 261 |
| CYP76M2  | AVEDIILAIA  | KPNVSDLFPP  | LRPLD--LQG | WRRWAEKRYD  | TVFDILDNIT   | NSRLAD---- | -----ASAGN  | HA-----G        | 269 |
| CYP76M10 | TLEDIILAIA  | KPNVSDLFPP  | LRRLD--LQG | WRRWAEKRYD  | KVFGILDKII   | NSRLAD---- | -----ADADA  | STKKH-----G     | 273 |
| CYP76M5  | LVEDLVEAIA  | KPNVSDLFPP  | LRQLD--LQG | LRRRTERMA   | RAFGLDGI     | DRRLAN---- | -----RT---  | HGDRH-----G     | 274 |
| CYP76M9  | LVEELIESIA  | KPNVSDLFPP  | LRFRD--LQG | WRRWTSGLHA  | KIYKVLDDII   | DRRTAE---- | -----DDA--  | AMDKR-----G     | 271 |
| CYP76M6  | LIEDIATVA   | GNVSDFFPP   | LRQLD--LQG | LRRQTSGLHG  | IVFGLDDII    | DRRMAE---- | -----TRDHP  | DKQRH-----G     | 276 |
| CYP76M1  | SMTFLMEVVS  | KTNVSDFFPP  | LRPLD--LQG | WRRWAEKRYD  | RVTCFLDDVI   | DRRFA----  | -----ADA    | SANRH-----G     | 268 |
| CYP76M7  | VVDDIISVVG  | KPNISDFYFP  | LRPLD--LQG | LRRWTKRFN   | RVFSIMGDI    | DRRL-----  | -----AHIRD  | GKPRH-----      | 269 |
| CYP76M8  | VVDDIILVVG  | KPNVSDFFPP  | LRPLD--LQG | LRRWTKRFN   | RVFSIMGDI    | DRRL-----  | -----AHIRD  | NKPRH-----      | 270 |
| CYP71M14 | HVDEIMTVFA  | QPNVSDFFPP  | LRRLD--LQG | LRRSTKRRFD  | RIFSILDDIV   | ERRLVDRGER | GGEKGASSNS  | SKSKHQYDGG      | 290 |
| CYP76M13 | LMEDIVAILA  | KPNASDFFP   | LRPLD--LQG | IRHWTAIHMS  | RVHLILDSII   | DCRLAQGTDD | QCK-----    | -----           | 257 |
| CYP76L1  | LVRDVEEAT   | KPNLSDFLPV  | LAALD--LQG | RRRTAVHIR   | KFHDFDEII    | SRR-----   | -----Q      | NAGGEGERKE      | 278 |
| CYP76C2  | TVIGVMEAVG  | NPDAANFFFP  | LGFLD--LQG | NRKTLKACSE  | RLFKVFRGFI   | DAKLAEKSLR | -----       | -----DTNSKDVRER | 280 |
| CYP701A6 | TVTDMMCAI   | EVDWRDFFPY  | LSWVFN--KS | FETRVFTTET  | RRTAVMRALI   | KQKQERIV-- | -----       | -----RGEAKT     | 285 |
| CYP71Z3  | --LDVLLRLQ  | KE--GDTPIP  | ITMELIVMLL | FDIVSGTET   | STIVLNWTMA   | ELIRTPVMT  | KAHAEVQRTF  | QAKSTIT-ED      | 358 |
| CYP71Z4  | --LDVLLRLQ  | KD--GNTPIP  | ITNEVIVMLL | FDMFSGSET   | SSSTLIWTMA   | ELIRKPKVMA | KAHVEVRQAF  | QKKNSTIT-ED     | 359 |
| CYP71Z8  | --LDVLLRLQ  | KE--GDTPIP  | ITNETMMLLL | HDMFSGSET   | SSTLIWTMA    | ELIKSPRVMA | KVHDEVRQAF  | QGKNTIT--D      | 359 |
| CYP71Z6  | --LDVLLRLQ  | KE--GGTPVP  | VTDEIIVVLL | FDMISGASET  | SPTVLWTLA    | ELMRNPRIMA | KAQAEVRQAV  | AGKTTIT-ED      | 356 |
| CYP71Z7  | --LDVLLRLQ  | KE--GGTPVP  | VTDEIIVVLL | FDMFTGASET  | SPTVLWTLA    | ELMRCPRVMA | KAQAEVRQAA  | VGKTRIT-EN      | 355 |
| CYP71Z5  | --LSVLLGLQ  | KE--GGTPIP  | ITNEIIVVLL | FDMFSGSET   | SATVMIWIMA   | ELIRWPRVMT | KVQAEVRQAL  | QGVTVT-ED       | 353 |
| CYP71Z1  | CSLDLRLQ    | KE--GGSPIP  | ITNEVIVVLL | MDMFAAGTDT  | SSTLIWAMA    | ELIRSPRVMA | KVQSEMRQIF  | DGKNTIT-ED      | 344 |
| CYP71Z2  | SLDVLLRLQ   | KE--GGTPIP  | ITNQIVTVLL | WDMFAGTDT   | SSTLIWTMA    | ELMRSPRVMA | KVQAEVRQAF  | QKKNSTIT-ED     | 358 |
| CYP71W1  | DLLSVLLRLQ  | RS--GGLKFA  | LTTEIISTVI | FDIFSGSET   | SSTLIWTMS    | ELMKNPRILR | KAQSEVRETF  | KGQDKL-ED       | 351 |
| CYP99A2  | SLVNVLLRIR  | DQ--GDLEFP  | FGTTNKAI   | LDMFTGTET   | TSSAAEVMWS   | ELMRNPEVMA | KVQAEVRRVF  | DNKSPQD-HE      | 346 |
| CYP99A3  | SLVNVLLRIR  | DQ--GELDFP  | FSVTHVKAII | LDMFTGTET   | TSSTEWLMS    | ELMRNPEVMA | KVQAEVRGVF  | DNKSPQD-HE      | 341 |
| CYP71B13 | DIVDLLLQVE  | RGEIGLGEFQ  | FTRNHTKGI  | LDILLAGVDT  | SGHTITWVMT   | HLIKNPRVMK | KAQAEVREVI  | KNKDNIT-EE      | 340 |
| CYP76M2  | DFLDSLLELM  | S--YG---K   | IARDVTTIM  | FDVFGAGTDT  | IAITVQWAMA   | ELLRNPSIMA | KARTEMEDVL  | AGKK--TIEE      | 341 |
| CYP76M10 | DFLDSLLELM  | S--AG---K   | IACDDVTTIM | FDVFGAGTDT  | ISNTVQWAMA   | ELLRNPSIMA | KVRAEMEDVL  | AGKK--TIEE      | 345 |
| CYP76M5  | DFLDALDLV   | S--EG---K   | MARDHVTTML | FEVFGAGSDT  | MSVSLWAMA    | ELLRNPRAMR | KARAELEDA   | A-----VVEE      | 343 |
| CYP76M9  | DFLDVLELM   | S--TG---K   | IAREYLTNII | FDVFTAGSDT  | MSLTVVWAMA   | ELLRNPGVMA | KARAEIDAAL  | GGRE--AVEE      | 343 |
| CYP76M6  | DFLDALISLA  | S--AG---K   | IPRYHITYLL | FDVFAAGADT  | MTTTVEWAMA   | ELLRNPRVMA | KVRAEVDAL   | GGRE--SFDE      | 348 |
| CYP76M1  | DFLDSLLELV  | S--TG---K   | IVRENVTTIL | LDVFIAGSDT  | IATVVEWAMA   | ELLRNPSVMA | KVRAEMDGL   | GGKK--TVDE      | 340 |
| CYP76M7  | DFLDSLLELM  | A--TG---K   | MERVNVNML  | FEAFVAGVDT  | MALTLEWVMA   | ELLHNPAIMA | RVRAELSDVL  | GGKE--AVEE      | 341 |
| CYP76M8  | DFLDSLLELM  | A--AG---K   | IDRVNVNML  | FEAFVAGADT  | MALTLEWVMA   | ELLKNPSVMA | KARAEIRDVL  | GDKE--IVEE      | 342 |
| CYP71M14 | DFLDALLELM  | V--TG---K   | MERDDVTAM  | FEAFVAGGDT  | VAFTLEWVMA   | DLLRNPPVMA | KLRAELDDVL  | GGKQDQSAIEE     | 364 |
| CYP76M13 | DVLDLLELVLM | S--TG---K   | LSRRDVKILL | FDILAAGTET  | TKITVEWAMA   | ELLRNPNVMA | TTRAEMKAAL  | GGN--GTITE      | 329 |
| CYP76L1  | DFLDVLLQLH  | S--AD---Q   | LSLDTIKTFL | GDLFTAGTDT  | NSITVEWAMA   | ELLRHPAAMS | RARAEIRDAL  | GAKPH--DE       | 350 |
| CYP76C2  | DFVDVLLDLT  | EGDEA---E   | LNTNDIVHLL | LDLFGAGTDT  | NSSTVEWAMA   | ELLRNPEVMA | KAQAEIDCVI  | GQK--GVVEE      | 354 |
| CYP701A6 | CYLDFLLAEN  | T-----      | LTDEQLMMLV | WEALIEAADT  | TLVKTTEWAMY  | ELAKNPDKQE | RLYQEIREFC  | GDE--TVTE       | 353 |
| CYP71Z3  | DDISGLTYLK  | MVIKESLRMH  | CPVPLGPRK  | CRET-CKVMG  | YDILKDTTVF   | VNAWAMCRSS | IYWNDAEEFK  | PERFENKC--      | 435 |
| CYP71Z4  | DGVNELTYLK  | MVIKESLRMH  | CPVPLGPRK  | CRET-CKVMG  | YDIPKDTTVF   | VNAWAICRDP | KYWDDAEEFK  | PERFENKS--      | 436 |
| CYP71Z8  | DDVAKLSYLK  | MVTKESLRMH  | CPVPLGPRK  | CRET-CKVMG  | YDVPKGTIVF   | VNAWAICRDS | KYWKSAEEFK  | PERFENIS--      | 436 |
| CYP71Z6  | D-IVGLSYLK  | MVIKETLRLH  | PPAPLLNPRK | CRET-SQVMG  | YDIPKGTSVF   | VNMWAICRDS | RYWEDPEEFK  | PERFENNS--      | 432 |
| CYP71Z7  | D-IVGLSYLK  | MVIKETLRLH  | SPAPLLNPRK | CRET-TQVMG  | YDIPKGTSVF   | VNMWAICRDP | NYWEDPEEFK  | PERFENNC--      | 431 |
| CYP71Z5  | D-IVRLNLYK  | MVIKETLRLH  | CPGPLLPHR  | CRET-CKVMG  | YDVLKGTCTV   | VNVWALGRDP | KYWEDPEEFM  | PERFENS--       | 429 |
| CYP71Z1  | D-LVQLSYLK  | MVIKETLRLH  | CPLPLLAPRK | CRET-CKIMG  | YDVPKGTSAF   | VNVWAICRDS | KYWEDAEEFK  | PERFEND--       | 420 |
| CYP71Z2  | D-LAQLSYLK  | MVLKESFRLH  | CPVPLSPPRK | CRET-CKIMG  | YDVPKGTSAF   | VNVWAICRDS | MYWKNAEEFK  | PERFEND--       | 434 |
| CYP71W1  | D-VAKLSYLK  | LVIKETLRLH  | PPAPLLIPRE | CRET-CQVMG  | YDVPKGTSAF   | VNVWVIGREG | EYWGDEIFR   | PERFENST--      | 427 |
| CYP99A2  | GLIDNLRMYK  | MVIKETMRLN  | PVPLLMPHL  | CRET-CQIGG  | YEVEGTRVY    | INSWAMARSP | EYWDDAEEFK  | PERFEDGM--      | 423 |
| CYP99A3  | GLLENLSYMK  | LVIKETLRLN  | PVPLLPHL   | CRET-CEIGG  | YEIVEGTRVY   | INSWAMARSP | EYWDDAEEFK  | PERFEDGT--      | 418 |
| CYP71B13 | D-IEGLELYK  | MVVKETLRLN  | PLVPLTPRE  | ASKD-VKIGG  | YNI PKKTWIIH | VNIWAHRNP  | NVWKDPEAFI  | PERFMNDQ--      | 416 |
| CYP76M2  | NDTEKLPYLR  | AVIKEAMRLH  | PVAPILLPHR | AAEDGVEIGG  | YAVPKGSTVI   | VNVWAIMRDP | TAWERPDEFM  | PERFLQR--       | 418 |
| CYP76M10 | NDTEKLPYLR  | AVIKEAMRLH  | PVAPILLPHR | AAEDGVEIGG  | YAVPKGSTVI   | VNVWTIMRDP | AAWERPDEFM  | PERFLQR--       | 422 |
| CYP76M5  | SDAARLPYLQ  | AVVKEAMRLH  | PVGPILLPHR | AAEDGVEIGG  | YAVPRGAMVI   | VNAWAIMRDP | AAWERPDEFV  | PERFMET--       | 420 |
| CYP76M9  | ADVARMPLYQ  | AVLKEAMRLH  | PVAPVMLPRK | AAEDGVEIGG  | FEVPRGCAVI   | FNTWAIMRDP | AAWERPDEFV  | PERFVGRSRA      | 423 |
| CYP76M6  | GDAASLTYLQ  | CVFKEAMRLH  | PVGSILVPHR | AVQDGVVEIGG | YAVPKGTSTVI  | VNAWAIMRDP | AAWESPQDFL  | PERFLRKEES      | 428 |
| CYP76M1  | PDIARLPYLQ  | AVVKEAMRLH  | PAAPLLPHR  | AVQDGVVEIGG | YAVPKGSMVI   | VNVWAIMRDP | AAWERPDEFM  | PERFLIRRGDD     | 420 |
| CYP76M7  | ADAARLPYLQ  | AVLKEAMRLH  | PVGALLPHF  | AAEDGVEIGG  | YAVPRGSTVL   | VNAWAIMRDP | AAWERPDEFV  | PERFLGRS--      | 419 |
| CYP76M8  | ADAARLPYLQ  | AVLKEAMRLH  | PVGALLPHF  | AAEDGVEIGG  | YAVPKGTSTVI  | VNAWAIMRDA | AAWERPDEFV  | PERFVERT--      | 420 |
| CYP71M14 | HADGRLPYLQ  | AVLKESMRLH  | SVGPLL-HHF | AAEDGVVVG   | YAVPRGATVL   | FNTRAIMRDP | AAWERPDEFM  | PERFLARE--      | 441 |
| CYP76M13 | ADVNVLPYLQ  | AAVKESMRLH  | PVAPLLPHL  | VVEDGVRIGG  | YAVSKGTTVI   | VNSWAIMRDS | TAWERPDDFL  | PDRFLGKTE       | 408 |
| CYP76L1  | SDIGRLPYLQ  | AVVMETMRLH  | PPSPLMPHE  | AAVADGAAVGG | YAVPRGKTVI   | VNVWSIMRDP | ASWPRPEEF   | PERFVAAGG       | 429 |
| CYP76C2  | SDISALPYLQ  | AVVKETFRHL  | PAAPLLVPRK | AESD-VEVLG  | FYVPKDTQVF   | VNVWAIGRDP | NVWENSSRF   | PERFLGKD--      | 431 |
| CYP701A6 | EHLPRLPYLN  | AVFHETLRRH  | SPVPLIPPRF | VHED-TKLAG  | YDVPAGTEMV   | VNLYGCNMNR | KEWESPEEWV  | PERFAGGR--      | 430 |

Supplemental Figure 1C

|          | 500        | 520        | 540        | 560        |            |            |            |             |     |
|----------|------------|------------|------------|------------|------------|------------|------------|-------------|-----|
| CYP71Z3  | ----IDYKGS | NF-EFIPFGS | GRRMCAGMNL | GMADVEFPLA | SLLYHFDWKL | PDGMSPEDID | MQEAPGLFGG | RRTSLILCPI  | 510 |
| CYP71Z4  | ----IDFKGS | NF-EFLPFGS | GRRMCAAMNL | GIANVELPLA | SLLYHFDWKL | PDGMMPEDVD | MQDAPGILVG | KRSSLIMCPV  | 511 |
| CYP71Z8  | ----IDYNGN | NF-EFLPFGS | GRRICPGITL | GMANVEFPLA | SLLYHFDWKL | PNQMEPEEID | MREAPGLVGP | KRTSLYLHPV  | 511 |
| CYP71Z6  | ----VDYKGN | NF-EFLPFGS | GRRICPGINL | GVANLELPLA | SLLYHFDWKL | PNGMAPKDLD | MHETSGMVAA | KLITLNICPI  | 507 |
| CYP71Z7  | ----VDFKGN | NF-EFLPFGS | GRRICPGINL | GLANLELALA | SLLYHFDWKL | PNGMLPKDLD | MQETPGIVAA | KLTTLNMCVP  | 506 |
| CYP71Z5  | ----MDYKGN | TF-EYLPFGS | GRRICPGINL | GIANIELPLA | SLLYHFDWKL | PDEMASKDLD | MQEAPGMVAA | KLTSLCVCP   | 504 |
| CYP71Z1  | ----IEFKGS | NF-EFLPFGS | GRRVCPGINL | GLANMEFALA | NLLYHFDWKL | PNGMLHKDLD | MREAPGLLVY | KHTSLNVCPV  | 495 |
| CYP71Z2  | ----IELKGS | NF-KFLPFGS | GRRICPGINL | GWANMEFALA | NLLYHFDWNL | PDGMLHKDLD | MQESPGLVAA | KCSDNLVCPV  | 509 |
| CYP71W1  | ----VDFRGA | DF-EFIPFGA | GRRMCPGIAL | GLANMELALA | SLLYHFDWEL | PDGIKSEELD | MTEVFGITVR | RKSKLWLHAI  | 502 |
| CYP99A2  | ----ADYKGS | RF-EYLPFGT | GRRRCPGDTF | GMVLLELIVA | RLLYYFDWSL | PAGMQPDDVD | MDFVVTATTR | RKNHLQLVAS  | 498 |
| CYP99A3  | ----ADFKGS | RF-EYLPFGT | GRRRCPGDIF | AMATLELIVA | RLLYYFDWSL | PDGMQPGDID | MELVVGATAR | RKNHLQLVAS  | 493 |
| CYP71B13 | ----IDYKGL | NF-ELLPFGS | GRRICPGIGM | GMALIHLLTI | NLLYRFDWKL | PEGMEVEDVD | LEESYGLVCP | KKVPLELIPV  | 491 |
| CYP76M2  | AE--VDFRGG | DF-EFMPFGA | GRRLCPLPMP | AERVVPFILA | SLLHAFEWRL | PDGMSAEELD | VSEKFTTANV | L--TVPLKAV  | 493 |
| CYP76M10 | AE--VDFRGG | DF-EFIPFGA | GRRLCPLPMP | TERVVPFILA | SLLHAFEWRL | PVGVAEELD  | LSEKFTTVNV | L--VTPLKAI  | 497 |
| CYP76M5  | TTA-IDFRGG | EY-EYLPFGS | GRRLCPLPLP | AERVVPFVLA | SLLRAFEWRL | PDGVSAEELD | VSERFNTANV | L--AVPLKVV  | 496 |
| CYP76M9  | TEE-MDFRGG | DF-GFLPFGS | GRRLCPLPMP | AERVLPLIMA | SLLHAFEWRL | PDGMSAEQLD | VSEKFTTANV | L--AVPLKAV  | 499 |
| CYP76M6  | SSPPLERLGG | DY-EYIPFGS | GRRLCPLPLP | AERAVPFILA | SLLHAFEWRL | PDGMSPDMD  | MTEKFATANV | L--ATPLKAV  | 505 |
| CYP76M1  | DE--VDFWGG | TF-EFIPFGS | GRRVCAGLPM | AERVVPFMLA | SLLRAFEWRL | PDGVSAEELD | MRHRFTIANF | R--AIPLKAV  | 495 |
| CYP76M7  | --PQLDFRGG | DV-EFMPFGS | GRRLCPLPLP | AERVVPFILA | SMLHTFEWKL | PGGTAEDVD  | VSEKFKSANV | L--AVPLKAV  | 494 |
| CYP76M8  | --PQLDFRGG | DV-EFMPFGS | GRRLCPLPLP | AERVVPFILA | SMLHTFEWEL | PGGTAEELD  | VSEKFKTANV | L--AVPLKAV  | 495 |
| CYP71M14 | GKAPVDFRGG | EA-DFIPFGS | GRRLCPLPIL | AERVMPYILA | LMLREFEWRL | PDGVSPEELD | VSEKFMVNV  | L--AVPLKAV  | 518 |
| CYP76M13 | ----LDLWGG | QA-KFIPLGS | GRRLCPLPMP | VELVVPFTVA | SLLHAFEWHL | PKGMSAEELD | VTERYTSNDI | LVMATPLKAV  | 483 |
| CYP76L1  | ----SFRGG  | EMLEFMPFGA | GRRACPGTGM | ATRVTLVLA  | SLLRAFEWRL | PGGMRPCDVD | VRGRFGTS-- | LNMYTPLKAV  | 502 |
| CYP76C2  | ----IDLGR  | DY-ELTPFGA | GRRICPLPLP | AVKTVPMLA  | SLLYSFDWKL | PNGVGSLED  | MDETFGLT-- | LHKTNPPLHAV | 504 |
| CYP70A6  | -----LEVA  | DMYKTMAFGA | GRRACAGSLQ | ATHIACAAVA | RFVQEFGWRL | REG-DEEKVD | -----TV    | QLTAYKHLPL  | 495 |

|          |             |     |     |
|----------|-------------|-----|-----|
| CYP71Z3  | TRVAPSDLQV  | IV- | 522 |
| CYP71Z4  | TRVAPSNPQV  | IAS | 524 |
| CYP71Z8  | TRVAPSSV--  | --- | 519 |
| CYP71Z6  | THIAPSSA--  | --- | 515 |
| CYP71Z7  | TQIAPSSAED  | AS- | 518 |
| CYP71Z5  | TRVAPLISA-  | --- | 513 |
| CYP71Z1  | THIASSCA--  | --- | 503 |
| CYP71Z2  | THISSSCA--  | --- | 517 |
| CYP71W1  | PRVPYISTY-  | --- | 511 |
| CYP99A2  | PYKLAPIQI-  | --- | 507 |
| CYP99A3  | PYKPISMQS-  | --- | 502 |
| CYP71B13 | L-----      | --- | 492 |
| CYP76M2  | PILASSASEL  | QAS | 506 |
| CYP76M10 | PILASHQI--  | --- | 505 |
| CYP76M5  | PVIVN-----  | --- | 501 |
| CYP76M9  | PVVIAC----- | --- | 505 |
| CYP76M6  | PVASHTS---- | --- | 512 |
| CYP76M1  | PVVVS-----  | --- | 500 |
| CYP76M7  | PVLIK-----  | --- | 499 |
| CYP76M8  | PVLIK-----  | --- | 500 |
| CYP71M14 | PVKVIN----- | --- | 524 |
| CYP76M13 | PLIVT-----  | --- | 488 |
| CYP76L1  | PVVPARP---- | --- | 510 |
| CYP76C2  | PVKKRGRN--  | --- | 512 |
| CYP70A6  | HVHLTRRGRM  | --- | 505 |
